# Supplementary material for: Individuals with increased inflammatory response to ozone demonstrate muted signaling of immune cell trafficking pathways
Source: PubMed Central journal article supplement (PMC3607990; doi:10.1186/1465-9921-13-89), 2012-10-03
Supplement: 1465-9921-13-89-S1.pdf [file 1465-9921-13-89-S1.pdf]

**Additional File 1: Genes significantly differentially expressed after ozone challenge.** Genes are sorted according to expression level fold change (FC) (post-ozone challenge / pre-ozone challenge) in each groups.

| <b>Symbol</b>   | <b>Non-Responders' FC</b> | <b>Responders' FC</b> | <b>Significantly Altered in Non-Responders, Responders, or Both</b> |
|-----------------|---------------------------|-----------------------|---------------------------------------------------------------------|
| <i>SERPINE2</i> | 3.06                      | 2.10                  | Both                                                                |
| <i>CDKN3</i>    | 2.82                      | 1.85                  | Both                                                                |
| <i>CCND1</i>    | 2.73                      | 1.87                  | Both                                                                |
| <i>MMP2</i>     | 2.64                      | 1.99                  | Both                                                                |
| <i>SFRP1</i>    | 2.53                      | 1.91                  | Both                                                                |
| <i>NCF2</i>     | 2.42                      | 1.99                  | Both                                                                |
| <i>STK12</i>    | 2.22                      | 2.23                  | Both                                                                |
| <i>PSMB10</i>   | 736.50                    | 0                     | Non-Responders                                                      |
| <i>TXN2</i>     | 249.33                    | 0                     | Non-Responders                                                      |
| <i>SEMA3B</i>   | 89.74                     | 0                     | Non-Responders                                                      |
| <i>FCGR1A</i>   | 79.33                     | 0                     | Non-Responders                                                      |
| <i>FBN1</i>     | 33.65                     | 0                     | Non-Responders                                                      |
| <i>CCNG1</i>    | 31.65                     | 0                     | Non-Responders                                                      |
| <i>API5</i>     | 23.00                     | 0                     | Non-Responders                                                      |
| <i>SCUBE1</i>   | 19.94                     | 0                     | Non-Responders                                                      |
| <i>CD97</i>     | 19.59                     | 0                     | Non-Responders                                                      |
| <i>BRCA1</i>    | 18.35                     | 0                     | Non-Responders                                                      |
| <i>HAS1</i>     | 18.24                     | 0                     | Non-Responders                                                      |
| <i>LCN2</i>     | 17.57                     | 0                     | Non-Responders                                                      |
| <i>BCL3</i>     | 13.08                     | 0                     | Non-Responders                                                      |
| <i>GNLY</i>     | 12.69                     | 0                     | Non-Responders                                                      |
| <i>PLK2</i>     | 9.63                      | 0                     | Non-Responders                                                      |
| <i>NLRP11</i>   | 9.25                      | 0                     | Non-Responders                                                      |
| <i>STEAP</i>    | 8.82                      | 0                     | Non-Responders                                                      |
| <i>NGB</i>      | 6.23                      | 0                     | Non-Responders                                                      |
| <i>TUBA1</i>    | 5.36                      | 0                     | Non-Responders                                                      |
| <i>GATA3</i>    | 5.27                      | 0                     | Non-Responders                                                      |
| <i>BCL2A1</i>   | 4.94                      | 0                     | Non-Responders                                                      |
| <i>CHIT1</i>    | 4.86                      | 0                     | Non-Responders                                                      |
| <i>SEPP1</i>    | 4.78                      | 0                     | Non-Responders                                                      |
| <i>ALDH1B1</i>  | 4.46                      | 0                     | Non-Responders                                                      |
| <i>RELB</i>     | 4.42                      | 0                     | Non-Responders                                                      |
| <i>IL1R2</i>    | 4.29                      | 0                     | Non-Responders                                                      |
| <i>HLA-C</i>    | 4.28                      | 0                     | Non-Responders                                                      |
| <i>NMES1</i>    | 4.21                      | 0                     | Non-Responders                                                      |

| <b>Symbol</b>    | <b>Non-Responders' FC</b> | <b>Responders' FC</b> | <b>Significantly Altered in Non-Responders, Responders, or Both</b> |
|------------------|---------------------------|-----------------------|---------------------------------------------------------------------|
| <i>LOX</i>       | 4.01                      | 0                     | Non-Responders                                                      |
| <i>TBP</i>       | 4.00                      | 0                     | Non-Responders                                                      |
| <i>TNFRSF10C</i> | 3.99                      | 0                     | Non-Responders                                                      |
| <i>IL1B</i>      | 3.98                      | 0                     | Non-Responders                                                      |
| <i>B2M</i>       | 3.98                      | 0                     | Non-Responders                                                      |
| <i>IGFBP2</i>    | 3.92                      | 0                     | Non-Responders                                                      |
| <i>S100A12</i>   | 3.82                      | 0                     | Non-Responders                                                      |
| <i>SERPINF1</i>  | 3.77                      | 0                     | Non-Responders                                                      |
| <i>BATF</i>      | 3.69                      | 0                     | Non-Responders                                                      |
| <i>PSMC4</i>     | 3.63                      | 0                     | Non-Responders                                                      |
| <i>P2RY5</i>     | 3.62                      | 0                     | Non-Responders                                                      |
| <i>CCR9</i>      | 3.61                      | 0                     | Non-Responders                                                      |
| <i>SOD2</i>      | 3.60                      | 0                     | Non-Responders                                                      |
| <i>PSMC3</i>     | 3.52                      | 0                     | Non-Responders                                                      |
| <i>IL8RA</i>     | 3.50                      | 0                     | Non-Responders                                                      |
| <i>NCF4</i>      | 3.46                      | 0                     | Non-Responders                                                      |
| <i>GTPBP4</i>    | 3.45                      | 0                     | Non-Responders                                                      |
| <i>SEMA4C</i>    | 3.44                      | 0                     | Non-Responders                                                      |
| <i>SELL</i>      | 3.43                      | 0                     | Non-Responders                                                      |
| <i>PTMA</i>      | 3.42                      | 0                     | Non-Responders                                                      |
| <i>IFITM2</i>    | 3.37                      | 0                     | Non-Responders                                                      |
| <i>S100A8</i>    | 3.36                      | 0                     | Non-Responders                                                      |
| <i>HAS3</i>      | 3.35                      | 0                     | Non-Responders                                                      |
| <i>LILRB2</i>    | 3.29                      | 0                     | Non-Responders                                                      |
| <i>CCL28</i>     | 3.25                      | 0                     | Non-Responders                                                      |
| <i>ITGB7</i>     | 3.21                      | 0                     | Non-Responders                                                      |
| <i>NGFRAP1</i>   | 3.20                      | 0                     | Non-Responders                                                      |
| <i>PRDX4</i>     | 3.16                      | 0                     | Non-Responders                                                      |
| <i>PROK2</i>     | 3.15                      | 0                     | Non-Responders                                                      |
| <i>ADAM8</i>     | 3.12                      | 0                     | Non-Responders                                                      |
| <i>BCL6</i>      | 3.12                      | 0                     | Non-Responders                                                      |
| <i>NFKBIA</i>    | 3.07                      | 0                     | Non-Responders                                                      |
| <i>TGFBR3</i>    | 3.05                      | 0                     | Non-Responders                                                      |
| <i>COL5A1</i>    | 3.01                      | 0                     | Non-Responders                                                      |
| <i>ILF2</i>      | 3.01                      | 0                     | Non-Responders                                                      |
| <i>ODC1</i>      | 2.96                      | 0                     | Non-Responders                                                      |
| <i>GSTM3</i>     | 2.92                      | 0                     | Non-Responders                                                      |
| <i>SEMA5A</i>    | 2.83                      | 0                     | Non-Responders                                                      |

| Symbol         | Non-Responders' FC | Responders' FC | Significantly Altered in Non-Responders, Responders, or Both |
|----------------|--------------------|----------------|--------------------------------------------------------------|
| <i>ITIH2</i>   | 2.80               | 0              | Non-Responders                                               |
| <i>LEAP2</i>   | 2.77               | 0              | Non-Responders                                               |
| <i>EXO1</i>    | 2.76               | 0              | Non-Responders                                               |
| <i>IGFBP3</i>  | 2.75               | 0              | Non-Responders                                               |
| <i>PXMP2</i>   | 2.69               | 0              | Non-Responders                                               |
| <i>DHCR24</i>  | 2.64               | 0              | Non-Responders                                               |
| <i>CTNNAL1</i> | 2.61               | 0              | Non-Responders                                               |
| <i>AHSG</i>    | 2.61               | 0              | Non-Responders                                               |
| <i>BFAR</i>    | 2.58               | 0              | Non-Responders                                               |
| <i>TREM1</i>   | 2.50               | 0              | Non-Responders                                               |
| <i>GFPT2</i>   | 2.50               | 0              | Non-Responders                                               |
| <i>CYC1</i>    | 2.49               | 0              | Non-Responders                                               |
| <i>C4A</i>     | 2.48               | 0              | Non-Responders                                               |
| <i>HAS2</i>    | 2.48               | 0              | Non-Responders                                               |
| <i>IMPDH2</i>  | 2.44               | 0              | Non-Responders                                               |
| <i>LILRA3</i>  | 2.42               | 0              | Non-Responders                                               |
| <i>COL1A2</i>  | 2.40               | 0              | Non-Responders                                               |
| <i>CSF1R</i>   | 2.38               | 0              | Non-Responders                                               |
| <i>TFF1</i>    | 2.38               | 0              | Non-Responders                                               |
| <i>FCGR3B</i>  | 2.33               | 0              | Non-Responders                                               |
| <i>NQO1</i>    | 2.30               | 0              | Non-Responders                                               |
| <i>TROAP</i>   | 2.28               | 0              | Non-Responders                                               |
| <i>LILRB1</i>  | 2.20               | 0              | Non-Responders                                               |
| <i>FST</i>     | 2.08               | 0              | Non-Responders                                               |
| <i>PSMB5</i>   | 2.00               | 0              | Non-Responders                                               |
| <i>GBP2</i>    | 1.84               | 0              | Non-Responders                                               |
| <i>PDCD8</i>   | 1.81               | 0              | Non-Responders                                               |
| <i>NCR2</i>    | -0.34              | 0              | Non-Responders                                               |
| <i>ZNF144</i>  | -0.47              | 0              | Non-Responders                                               |
| <i>FAIM2</i>   | -0.66              | 0              | Non-Responders                                               |
| <i>HSPA5</i>   | -0.70              | 0              | Non-Responders                                               |
| <i>IL1F8</i>   | -0.99              | 0              | Non-Responders                                               |
| <i>SLC4A7</i>  | -1.28              | 0              | Non-Responders                                               |
| <i>P2RXL1</i>  | -1.33              | 0              | Non-Responders                                               |
| <i>ENG</i>     | -1.79              | 0              | Non-Responders                                               |
| <i>EGF</i>     | -2.12              | 0              | Non-Responders                                               |
| <i>ISG20</i>   | -2.29              | 0              | Non-Responders                                               |
| <i>GLA</i>     | -3.01              | 0              | Non-Responders                                               |

| <b>Symbol</b>      | <b>Non-Responders' FC</b> | <b>Responders' FC</b> | <b>Significantly Altered in Non-Responders, Responders, or Both</b> |
|--------------------|---------------------------|-----------------------|---------------------------------------------------------------------|
| <i>NRAS</i>        | -3.18                     | 0                     | Non-Responders                                                      |
| <i>MAPK11</i>      | -3.48                     | 0                     | Non-Responders                                                      |
| <i>SLC44A1</i>     | -4.75                     | 0                     | Non-Responders                                                      |
| <i>RAB2</i>        | -5.78                     | 0                     | Non-Responders                                                      |
| <i>MYC</i>         | -6.47                     | 0                     | Non-Responders                                                      |
| <i>RB1</i>         | -6.56                     | 0                     | Non-Responders                                                      |
| <i>ATRN</i>        | -9.17                     | 0                     | Non-Responders                                                      |
| <i>VAV3</i>        | -9.87                     | 0                     | Non-Responders                                                      |
| <i>AP1S1_HUMAN</i> | -12.18                    | 0                     | Non-Responders                                                      |
| <i>HYOU1</i>       | -13.49                    | 0                     | Non-Responders                                                      |
| <i>FADD</i>        | -14.33                    | 0                     | Non-Responders                                                      |
| <i>PPP5C</i>       | -16.63                    | 0                     | Non-Responders                                                      |
| <i>UBE2N_HUMAN</i> | -19.34                    | 0                     | Non-Responders                                                      |
| <i>GTF2F1</i>      | -21.66                    | 0                     | Non-Responders                                                      |
| <i>SLC20A2</i>     | -59.69                    | 0                     | Non-Responders                                                      |
| <i>VCL</i>         | -104.18                   | 0                     | Non-Responders                                                      |
| <i>CD163</i>       | 0                         | 4.21                  | Responders                                                          |
| <i>MAL2</i>        | 0                         | 3.79                  | Responders                                                          |
| <i>CLDN3</i>       | 0                         | 3.17                  | Responders                                                          |
| <i>RBBP7</i>       | 0                         | 2.79                  | Responders                                                          |
| <i>CLU</i>         | 0                         | 2.49                  | Responders                                                          |
| <i>ASS</i>         | 0                         | 2.42                  | Responders                                                          |
| <i>HLA-DRB1</i>    | 0                         | 2.41                  | Responders                                                          |
| <i>GAPD</i>        | 0                         | 2.25                  | Responders                                                          |
| <i>NMU</i>         | 0                         | 2.13                  | Responders                                                          |
| <i>ID1</i>         | 0                         | 1.97                  | Responders                                                          |
| <i>MYBL2</i>       | 0                         | 1.89                  | Responders                                                          |
| <i>TNC</i>         | 0                         | 1.85                  | Responders                                                          |
| <i>TGFB111</i>     | 0                         | 1.79                  | Responders                                                          |
