# Supplementary material for: Individuals with increased inflammatory response to ozone demonstrate muted signaling of immune cell trafficking pathways
Source: PubMed Central journal article supplement (PMC3607990; doi:10.1186/1465-9921-13-89), 2012-10-03
Supplement: 1465-9921-13-89-S2.pdf [file 1465-9921-13-89-S2.pdf]

**Additional File 2: Networks constructed using the inflammatory non-responders' ozone-associated genes.**

-----

| <b>Network Number</b> | <b>Molecules in Network</b>                                                                                                                                                                                                                                                                                             | <b>p-value</b> |
|-----------------------|-------------------------------------------------------------------------------------------------------------------------------------------------------------------------------------------------------------------------------------------------------------------------------------------------------------------------|----------------|
| <b>1</b>              | ALDH1B1, B2M, BATF, BFAR, Cbp, Cpla2, Fc gamma receptor, FCGR1A, FCGR3B, GFPT2, GLA, Has, HAS1, HAS2, HAS3, HLA Class I, HLA-B27, HLA-C, Ikb, Ikk (family), IL1F8, LILRB1, LILRB2, MHC Class I (complex), MHC CLASS I (family), NFkB (complex), NFkB (family), PLK2, PRDX4, PTMA, RELB, SAA, TGFBR3, TNFRSF10C, UBE2N   | 1E-43          |
| <b>2</b>              | 20s proteasome, AIFM1, AURKB, BCL6, Calpain, Caspase, CYC1, Cytochrome c, FADD, GATA3, GNLY, Histone h3, Histone h4, Hsp70, HSPA5, IgG, Igm, IL12 (complex), Immunoglobulin, Interferon alpha, ISG20, Jnk, MYC, NFKBIA, NGFRAP1, NQO1, PPP5C, PSMB5, PSMB10, Rb, RNA polymerase II, SELL, Serine Protease, SFRP1, TXN2  | 1E-35          |
| <b>3</b>              | ADAM8, Alp, C4A/C4B, COL1A2, COL5A1, collagen, Collagen Alpha1, Collagen type I, Collagen(s), CSF1R, Fibrinogen, FST, Growth hormone, Hsp27, HYOU1, Igfbp, IGFBP2, IGFBP3, IL1, JINK1/2, Laminin, Ldh, LDL, LOX, MMP2, PCGF2, Pdgf (complex), PDGF BB, PI3K (complex), S100A12, SERPINF1, Sod, SOD2, STAT5a/b, Tgf beta | 1E-26          |
| <b>4</b>              | ADCYAP1, ADK, ALDH1B1, APP, ATP, ATRN, C11orf82, cholesterol, DHCR24, dihydrotestosterone, F2, GFPT2, GLA, GULP1, IL1/IL6/TNF, IL1F8, ILF2, IMPDH2, ITGB7, LEAP2, LOC729505, NGB, NLR, P2RX2, P2RX5, P2RX6, PXMP2, Rac, RELA, RPL27, SEPP1, SLC16A5, SLC4A7, TNF, TRAFD1                                                | 1E-23          |
| <b>5</b>              | ABCC6, API5, CCR9, CCRL2, CD97, CSF1, CXCR1, DGKA, EXO1, FAIM2, FGF2, GPR37, GPR44, GPR146, HNF4A, HTR1E, hyaluronic acid, IFITM2, IFNA2, IL2, ITIH2, ITIH3, JKAMP, KRT8, LPAR6, NCR2, PSMC3, ROBO3, SEMA3B, SLC19A2, SLC44A1, TP53, TRO, TROAP, VEGFA                                                                  | 1E-23          |
| <b>6</b>              | AHSG, Akt, Ap1, BCL2A1, CCND1, CDKN3, Creb, Cyclin E, DHCR24, FAIM2, GBP2, Gm-csf, GTPBP4, hCG, Ifn gamma, MAP2K1/2, MAPK11, Mek, NCF2, NCF4, Nfat (family), Nfkb1-RelA, NRAS, P38 MAPK, Pld, PROK2, Raf, Ras, Ras homolog, Sapk, STEAP1, TCR, Tnf, TSH, Vegf                                                           | 1E-21          |
| <b>7</b>              | 26s Proteasome, Actin, Calmodulin, Ck2, EGF, ENG, ERK, Estrogen Receptor, F Actin, FSH, G protein alpha1, Gpcr, Gsk3, GST, GSTM3, Ifn, Insulin, Lh, Mapk, Mmp, ODC1, Pka, Pkc(s), PLC, PLC gamma, PP2A, PSMC4, RAB2A, RB1, Rock, S100A8, SERPINE2, SLC20A2, TUBA4A, VCL                                                 | 1E-19          |
| <b>8</b>              | AP1S1, BCL3, BRCA1, Cbp/p300, CCNG1, Cdc2, Cdk, Ctpb, Cyclin A, Cyclin D, E2f, ERK1/2, GC-GCR dimer, Gcn5l, Gelatinase, GTF2F1, Hat, Hdac, HISTONE, Holo RNA polymerase II, IL1R2, LCN2, N-cor, RNA polymerase I, Rxr, Smad2/3-Smad4, Sos, SWI-SNF, TBP, TFF1, TFIIA, TFIIF, Thyroid hormone receptor, TREM1, VAV3      | 1E-17          |
| <b>9</b>              | Ccl9, CCL24, CCL25, CCL27, CCL28, CCR9, CCRL2, CDH22, CEBPB, CHEMOKINE, CHIT1, CTNNAL1, CTNNB1, CXCL16, CYSLTR1, DEFA5, FBN1, FZD6, GHSR, GIPC2, heparin, IKK (complex), IL12 (family), IL1B, MYOC, PLB1, RHOA, SCUBE1, SCUBE2, SEMA4C, SEMA5A, SEPP1, SLC37A4, TMEM176B, Ubiquitin                                     | 1E-14          |
